# Supplementary material
Source: PubMed Central journal article supplement (PMC4388868)
Supplement: NIHMS666582-supplement.pdf [file NIHMS666582-supplement.pdf]

## Vasovasostomy/Vasoepididymostomy Checklist

### 1. Pre-operative predictors

- Obstructive interval: \_\_\_\_\_
- Presence of granuloma
- Testicular vassal remnant length: \_\_\_\_\_

### 2. Quality of gross fluid

- Clear
- Cloudy
- Creamy
- Pasty

### 3. Microscopic examination of vassal fluid

- Whole motile sperm
- Whole non-motile sperm
- Sperm parts (sperm heads/tails)
- Azoospermia
